# Supplementary material for: Green and facile synthesis of iron-doped biomass carbon dots as a dual-signal colorimetric and fluorometric probe for the detection of ascorbic acid
Source: Royal Society of Chemistry journal article supplement (doi:10.1039/d1nj05047h), 2021-12-27
Supplement: d1nj05047h1.pdf [file d1nj05047h1.pdf]

**Green and facile synthesis of biomass iron-doped carbon dots as dual-signal  
colorimetric and fluorometric probe for the detection of ascorbic acid**

Pengfei Fan<sup>1,2</sup>, Can Liu<sup>1,2</sup>, Congcong Hu<sup>1,2</sup>, Feifei Li<sup>1</sup>, Xi Lin<sup>1</sup>, Shengyuan Yang<sup>1,2\*</sup>,

Fubing Xiao<sup>1,2\*</sup>

1. College of Public Health, Hengyang Medical School, University of South China,  
Hengyang, Hunan, 421001, People's Republic of China.

2. Hunan Key Laboratory of Typical Environmental Pollution and Health Hazards,  
Hengyang, Hunan, 421001, People's Republic of China.

\*Corresponding author:

Prof. Shengyuan Yang, E-mail: [yangshyhy@126.com](mailto:yangshyhy@126.com)

Dr. Fubing Xiao, E-mail: [xiaofubing2008@163.com](mailto:xiaofubing2008@163.com)

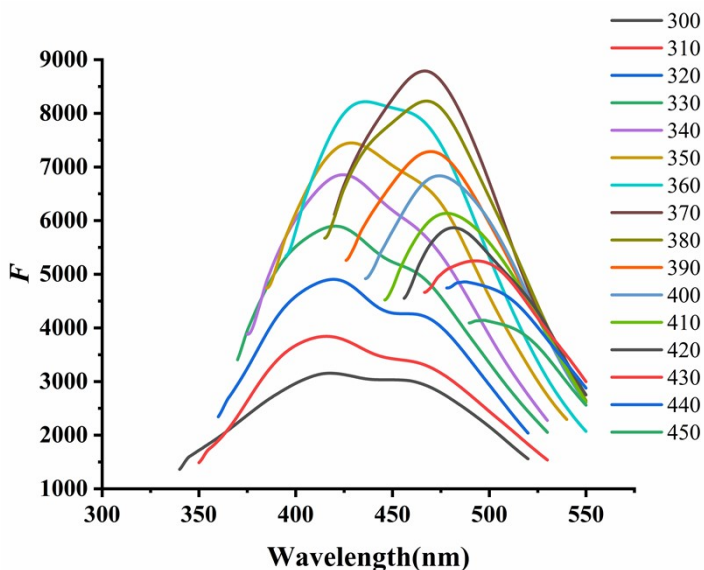

**Fig. S1** Fluorescence spectra of Fe-CDs with different excitation wavelength (300-450 nm)

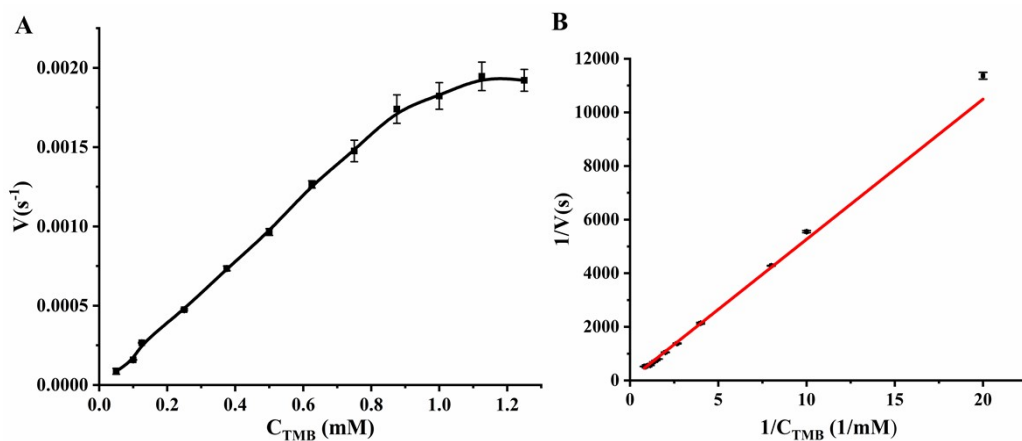

**Fig. S2** Kinetic study of the catalytic reaction of Fe-CD: (A) TMB concentration-velocity curve, (B) Lineweaver-Burk Linear

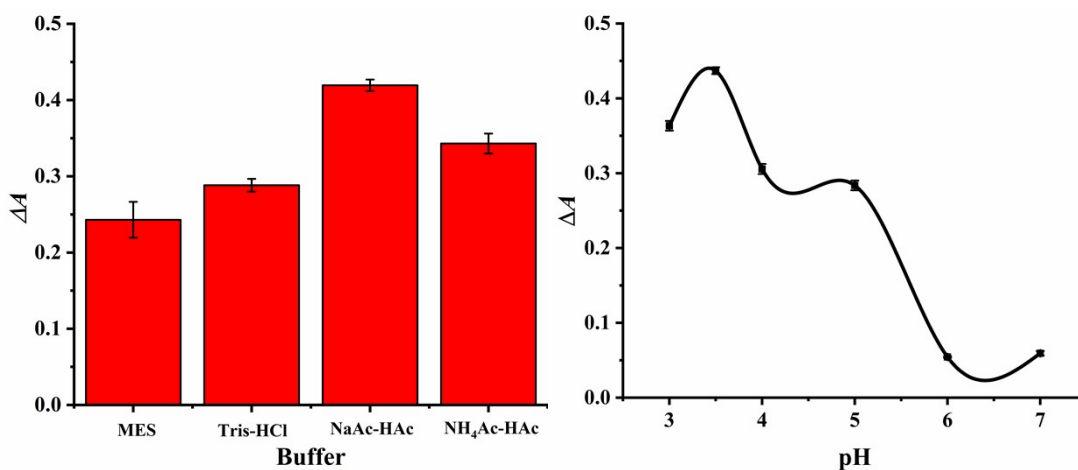

**Fig. S3** Effects of buffer types and pH on the system

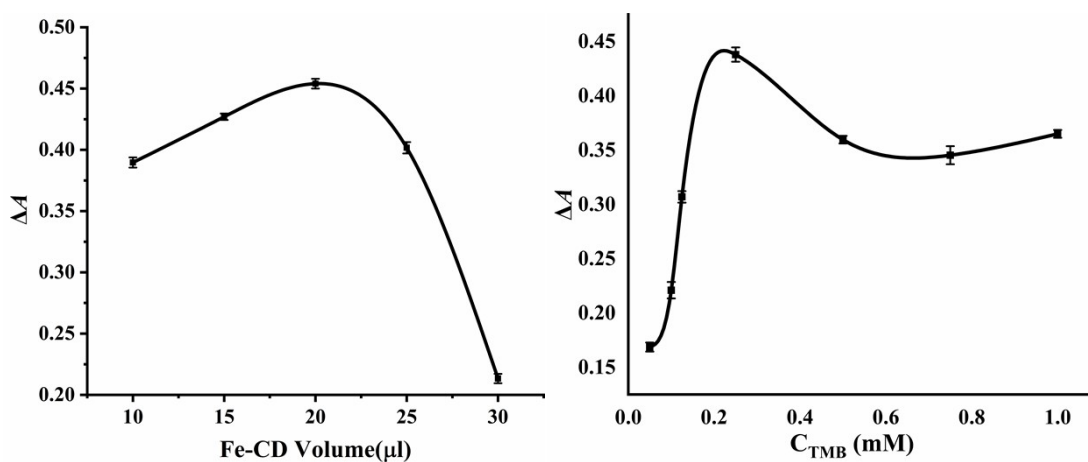

**Fig. S4** The effect of the volume of Fe-CDs and TMB on the system

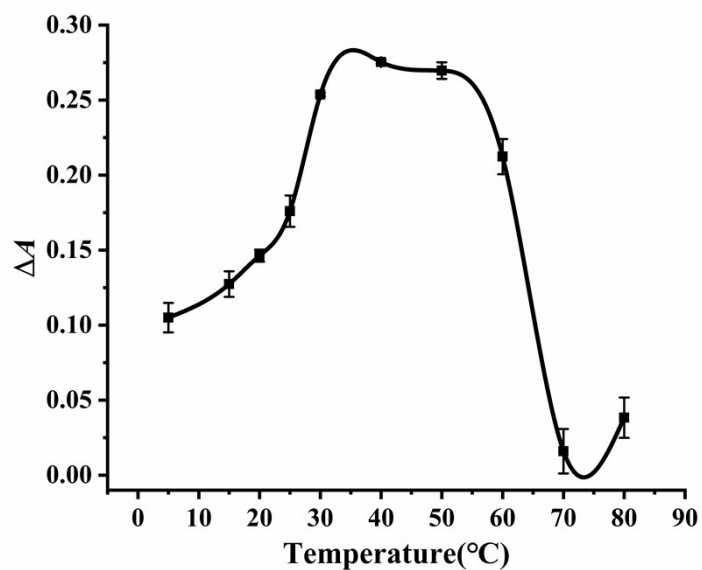

Fig. S5 The effect of the temperature on the system

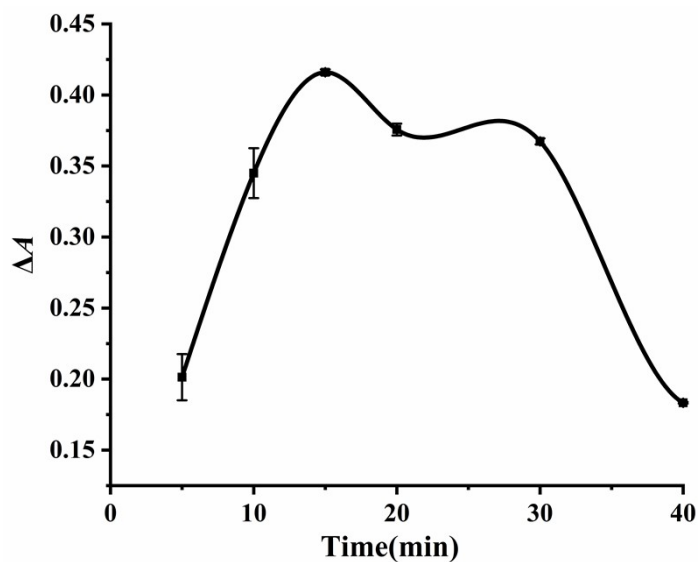

Fig. S6 The effect of the reaction time on detection system

Table S1 Comparison of several previously reported sensors for AA

| Materials <sup>a</sup>             | Method          | Linear range(μM) | LOD(μM) | Reference |
|------------------------------------|-----------------|------------------|---------|-----------|
| Silsesquioxane/histidine composite | Electrochemical | 400–4000         | 299     | [1]       |
| HMT-PMBI-coated electrodes         | Electrochemical | 25-450           | 41.4    | [2]       |
| CDs                                | Fluorometric    | 100-2800         | 60      | [3]       |
| LCQDs                              | Fluorometric    | 0-350            | 5.34    | [4]       |
| silver nanoparticle                | Colorimetric    | 20-10000         | 20      | [5]       |

|        |                               |        |      |           |
|--------|-------------------------------|--------|------|-----------|
| Fe-CDs | Colorimetric/<br>Fluorometric | 20-500 | 5.13 | This work |
|--------|-------------------------------|--------|------|-----------|

---

<sup>a</sup> LCQDs = lignin derived carbon quantum dots

## Reference

- [1] F. Dos Santos Franco, D.S. Fernandes and D.R. Do Carmo, *Mater. Sci. Eng. C Mater. Biol. Appl.*, 2020, **111**, 110739.
- [2] M. Rees, A.G. Wright, S. Holdcroft and P. Bertoncello, *Sensors (Basel)*, 2020, **20**, 443.
- [3] X. Ma, S. Lin, Y. Dang, Y. Dai, X. Zhang and F. Xia, *Anal. Bioanal. Chem.*, 2019, **411**, 6645-6653.
- [4] X.X. Gao, X. Zhou, Y.F. Ma, T. Qian, C.P. Wang and F.X. Chu, *Appl. Surf. Sci.*, 2019, **469**, 911-916.
- [5] J.L. Cholula-Díaz, D. Lomelí-Marroquín, B. Pramanick, A. Nieto-Argüello, L. A. Cantú-Castillo and H. Hwang, *Colloids Surf. B Biointerfaces*, 2018, **163**, 329-335.
